# Supplementary material for: Control of the neuroprotective Lipocalin Apolipoprotein D expression by alternative promoter regions and differentially expressed mRNA 5’ UTR variants
Source: PLOS journal article supplement (doi:10.1371/journal.pone.0234857), 2020-06-19
Supplement: S1 (10.1371/journal.pone.0234857.s001) [file journal.pone.0234857.s001]

## Raw images of Figure 3

Panel B

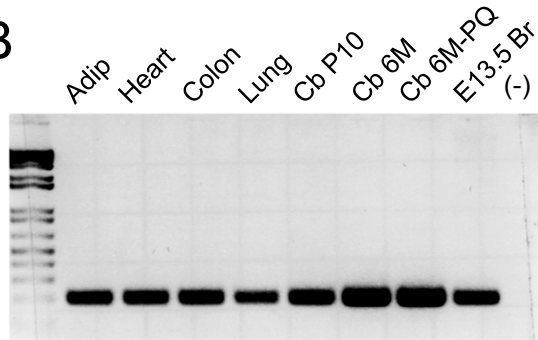

Panel C

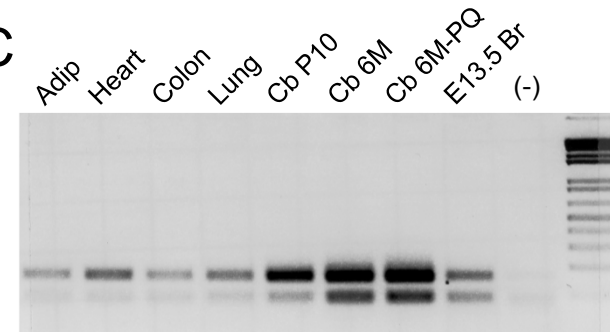

Panel D

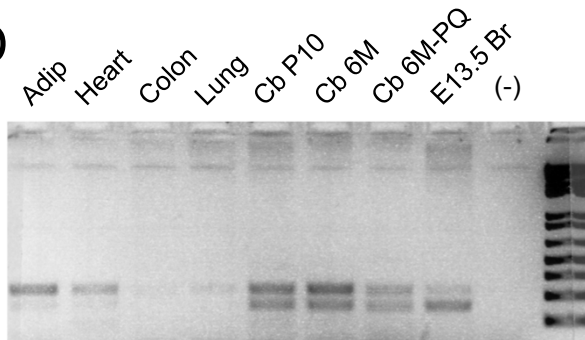

Panel E

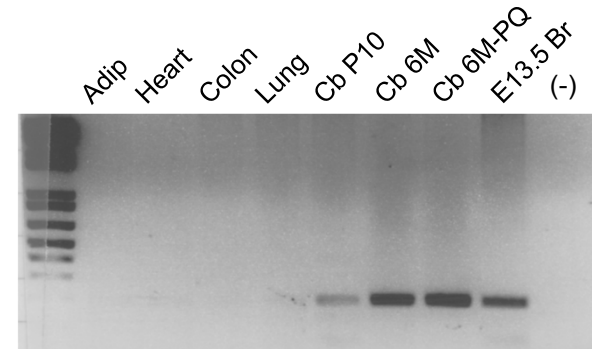

Panel F

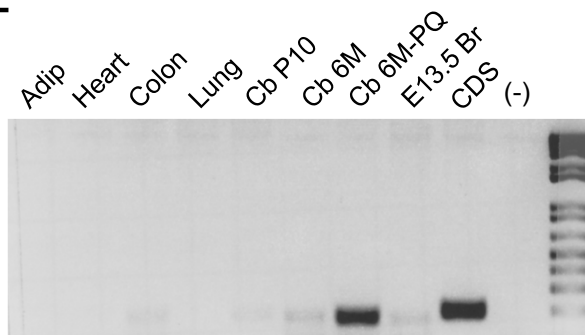

Panel I

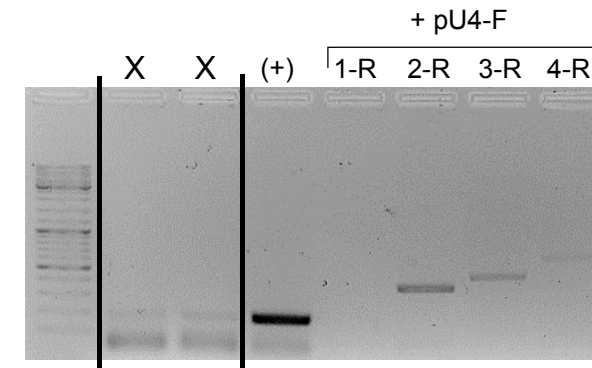

### S1\_raw\_images

PCR amplifications were separated electrophoretically in agarose gels labeled with ethidium bromide. Bands of Panels B-F were visualized with a UV light box, pictures taken with camera attached to a thermal printer, and images digitized with a calibrated scanner. Image of Panel I was taken and digitized with a GelDoc XR system (BioRad). Relevant controls and control samples appear on the same gel as the experimental samples in every panel. Lanes marked with X in Panel I were technical control amplifications for a different experiment, and thus not included in the final figure 3I. The faint band below lane (+) in Panel I represents primer dimers of the amplification.
